# Supplementary material for: Facile synthesis and performances of nanosized Li2TiO3-based shell encapsulated LiMn1/3Ni1/3Co1/3O2 microspheres
Source: Royal Society of Chemistry journal article supplement (doi:10.1039/c4ta00888j), 2014-01-01
Supplement: c4ta00888j1.pdf [file c4ta00888j1.pdf]

Supplementary Information

**Facile synthesis and performances of nanosized  $\text{Li}_2\text{TiO}_3$  shell  
encapsulated  $\text{LiMn}_{1/3}\text{Ni}_{1/3}\text{Co}_{1/3}\text{O}_2$  microsphere**

Xiukang Yang, Ruizhi Yu, Long Ge, Di Wang, Qinglan Zhao, Xianyou Wang\*, Yansong Bai, Hao Yuan, and Hongbo Shu\*

[\*] Key Laboratory of Environmentally Friendly Chemistry and Applications of Ministry of Education, School of Chemistry, Xiangtan University, Hunan, Xiangtan 411105, China  
E-mail: wxianyou@yahoo.com, hongboshu@xtu.edu.cn

**Keywords:** Lithium ion batteries, Layered lithium cathode materials, Hierarchical structure, Rate capability, Cyclic stability

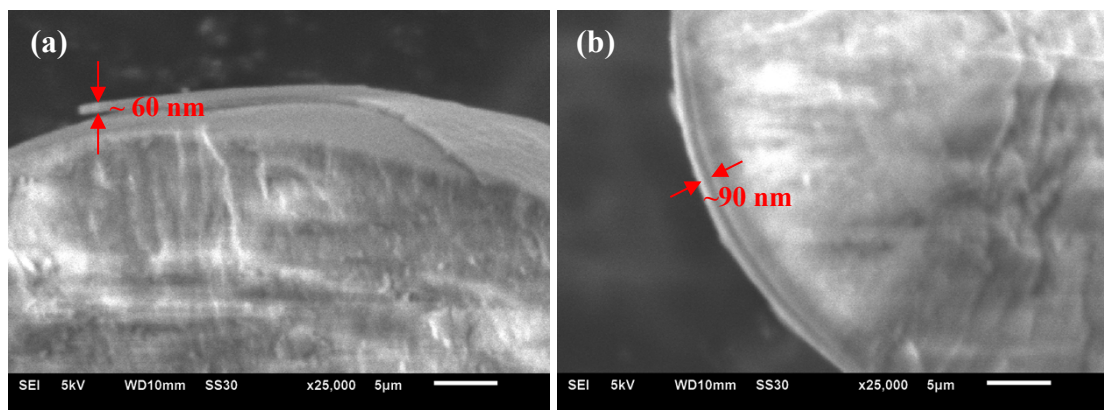

**Figure S1.** Cross-sectional SEM images of the TiO<sub>2</sub>@Ni<sub>1/3</sub>Co<sub>1/3</sub>Mn<sub>1/3</sub>CO<sub>3</sub> hybrid prepared with different content of concentrated ammonia: (a) 0.4 mL, (b) 0.6 mL.

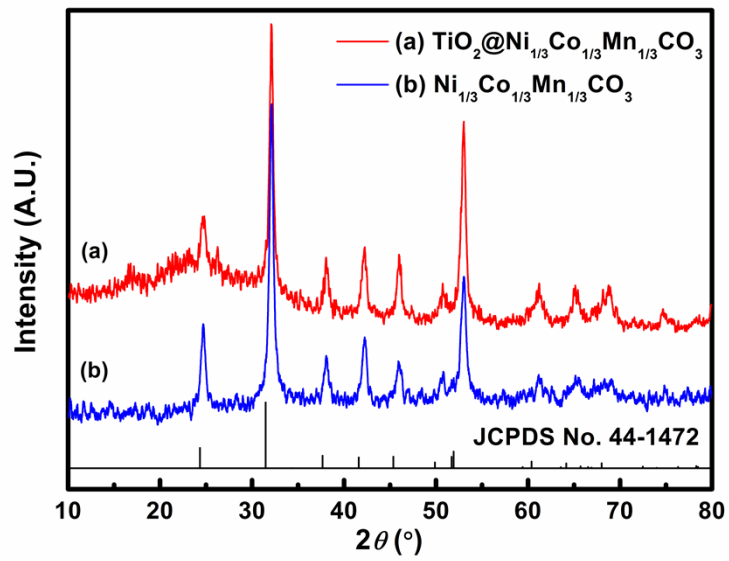

**Figure S2.** XRD patterns of the (a)  $\text{TiO}_2@_{\text{Ni}_{1/3}\text{Co}_{1/3}\text{Mn}_{1/3}\text{CO}_3}$  hybrid prepared with 0.4 mL of concentrated ammonia and (b) pristine  $\text{Ni}_{1/3}\text{Co}_{1/3}\text{Mn}_{1/3}\text{CO}_3$  microsphere.

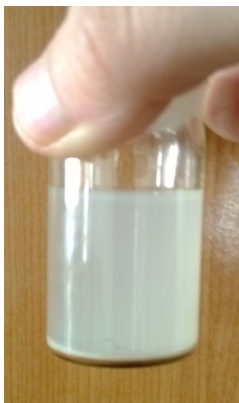

**Figure S3.** The optical photograph of the resulted mixture prepared with 0.6 mL of concentrated ammonia for 24 h of reaction time.

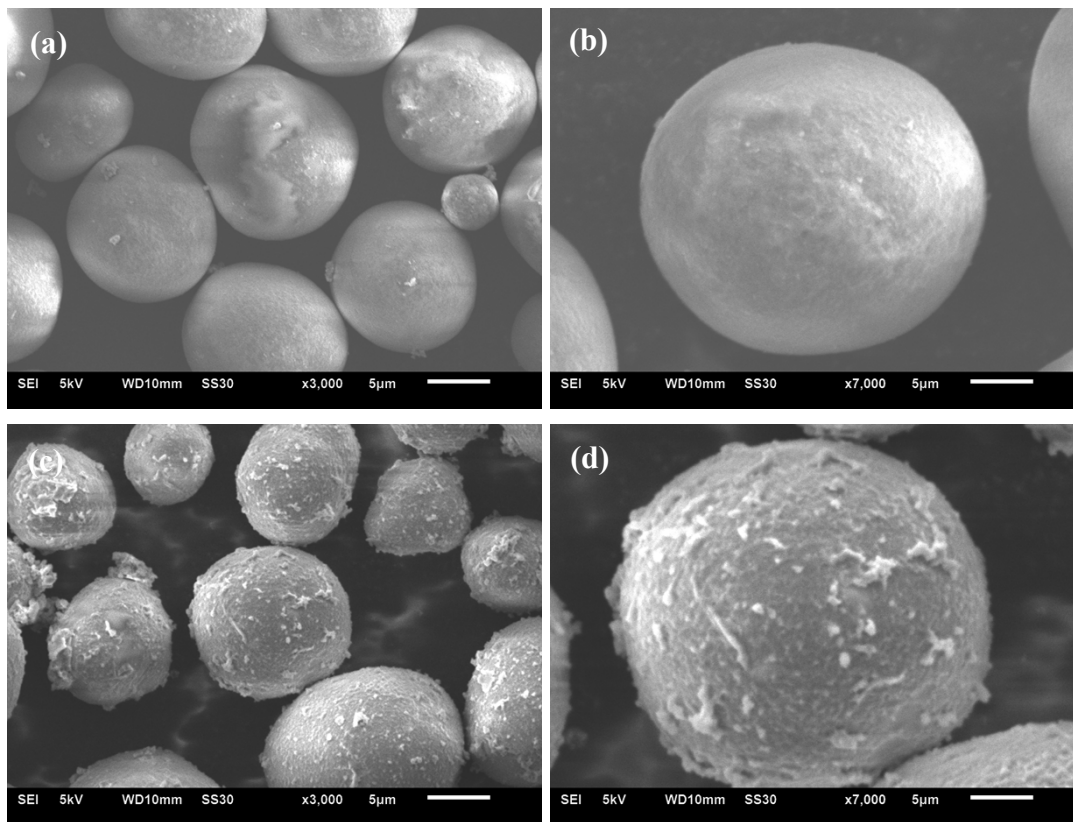

**Figure S4.** SEM images of the  $\text{TiO}_2@ \text{Ni}_{1/3}\text{Co}_{1/3}\text{Mn}_{1/3}\text{CO}_3$  hybrid prepared in a typical reaction system of  $\text{Ni}_{1/3}\text{Co}_{1/3}\text{Mn}_{1/3}\text{CO}_3$  powers (2.2 g), ethanol (50 mL), tetrabutyl titante (0.34 mL), and ammonia (0.4 mL) with different reaction duration: (a, b) 12 h, (c, d) 36 h.

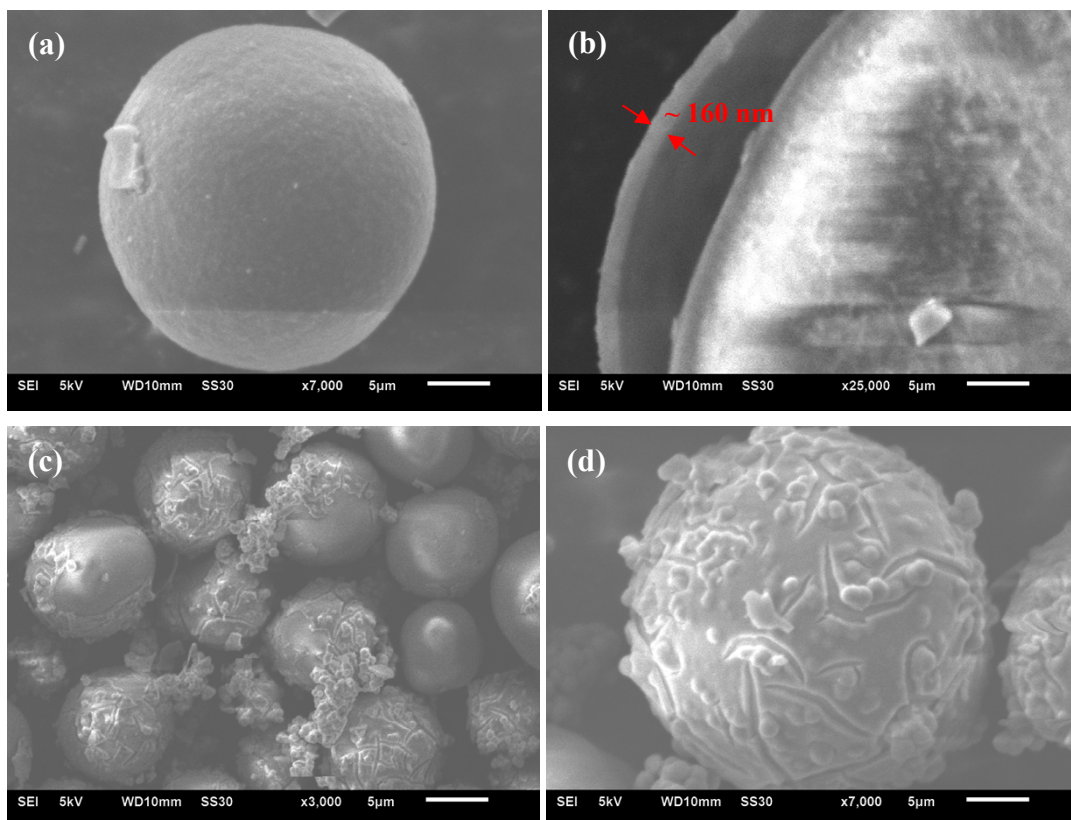

**Figure S5.** SEM images of the  $\text{TiO}_2@ \text{Ni}_{1/3}\text{Co}_{1/3}\text{Mn}_{1/3}\text{CO}_3$  hybrid prepared in a typical reaction system of  $\text{Ni}_{1/3}\text{Co}_{1/3}\text{Mn}_{1/3}\text{CO}_3$  powers (2.2 g), ethanol (50 mL), ammonia (0.4 mL), and reaction duration (24 h) with different volume of tetrabutyl titante: (a, b) 0.51 mL, (c, d) 1.13 mL.

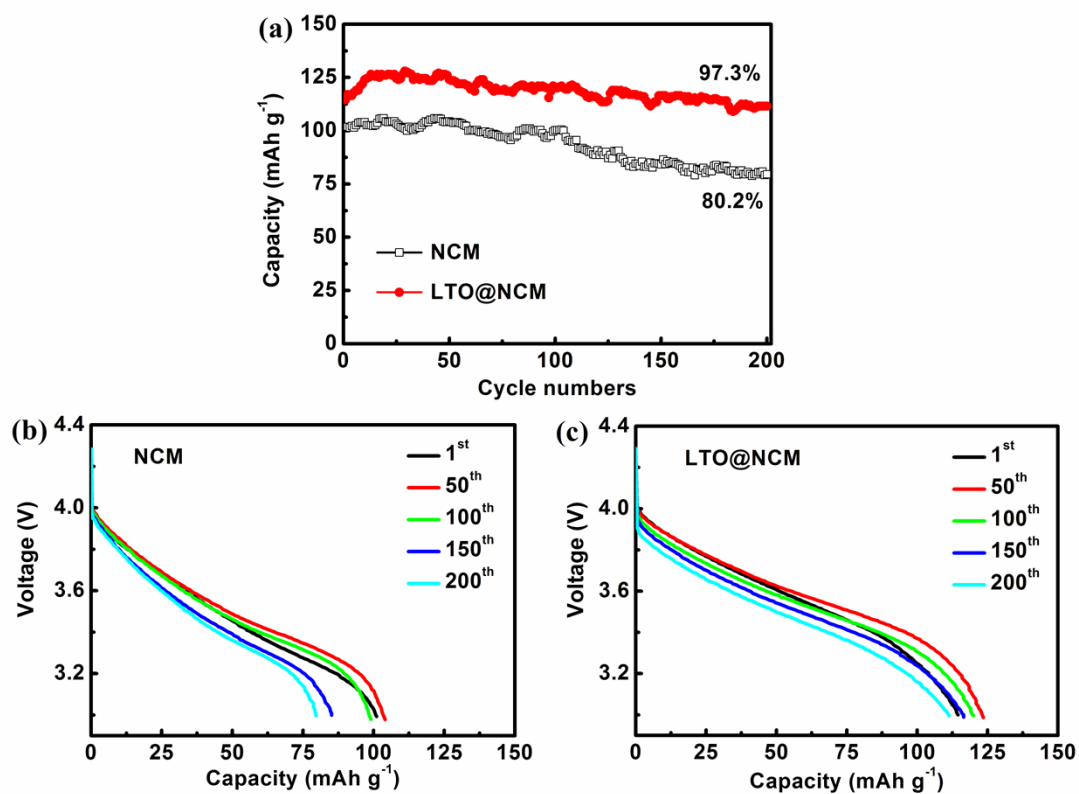

**Figure S6.** (a) Cycling performance and (b, c) corresponding continuous discharge curves of the Li/NCM cell and Li/LTO@NCM cell in the voltage range of 3.0-4.3 V at a rate of 10 C.
